# Supplementary material for: Prospective validation and assessment of cardiovascular and offspring risk models for pregnant women with congenital heart disease
Source: HighWire-hosted journal article supplement (doi:10.1136/heartjnl-2014-305597), 2014-07-17
Supplement: heartjnl-2014-305597supp.pdf [file heartjnl-2014-305597supp.pdf]

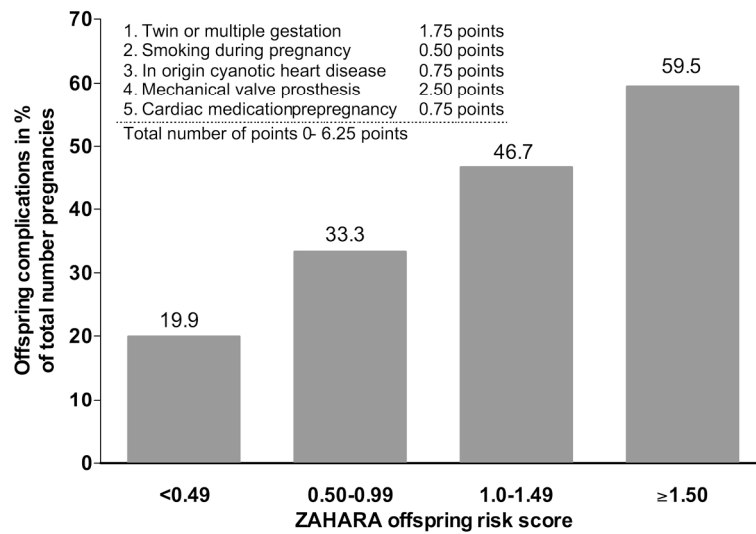

|                                |      |      |     |     |
|--------------------------------|------|------|-----|-----|
| Number of events               | 173  | 122  | 14  | 22  |
| Pregnancies at risk            | 869  | 366  | 30  | 37  |
| Percentage of total cohort (%) | 66.7 | 28.1 | 2.3 | 2.8 |

Appendix 1. The ZAHARA I risk score for offspring complications during 1302 completed pregnancies (>20 weeks gestation) in women with congenital heart disease (expressed as % of the total number of completed pregnancies). Data from the first ZAHARA study. Details on how the ZAHARA I risk score for offspring complications was calculated can be found in the methods section. More detail on the first ZAHARA study can be found in reference 2.

205x147mm (300 x 300 DPI)
